# Supplementary material for: Development of a mono-promoter-driven CRISPR/Cas9 system in mammalian cells
Source: PubMed Central journal article supplement (PMC4680873; doi:10.1038/srep18341), 2015-12-16
Supplement: srep18341-s1.pdf [file srep18341-s1.pdf]

## **Supplementary Information**

**Development of a mono-promoter-driven CRISPR/Cas9 system in mammalian cells.**

Shin Yoshioka, Wataru Fujii, Tetsuhiro Ogawa, Koji Sugiura, Kunihiko Naito

**Supplementary Materials and Methods:** (Page 2-3)

**Supplementary Figure 1:** Direct sequence analysis data. (Page 4)

**Supplementary Figure 2:** Comparison of gRNA expression level among the U6-gRNA, pCAG-RGR and mono-promoter types vectors. (Page 5)

**Supplementary Figure 3:** T7EI assay of potential off-target loci for *HPRT1*. (Page 6)

**Supplementary Figure 4:** The eGFP expression of pCAG-RGR-eGFP and pCAG-RGR-IRES-eGFP. (Page 7)

**Supplementary Figure 5:** Comparison of Cas9 expression level between the Cas9 individually-driven CRISPR/Cas9 system and mono-promoter-driven CRISPR/Cas9 system. (Page 8)

**Supplementary Figure 6:** Ubiquitous expression of Cas9 induce the off-doxycycline gene disruption. (Page 9)

**Supplementary Figure 7:** Sequence of vectors and RGR. (Page 10-14)

**Supplementary Table 1:** Target sequence of human *HPRT1* and *FAN1* locus and primer sequence for RGR. (Page 15)

**Supplementary Table 2:** Primer sequence for universal vector. (Page 16)

**Supplementary Table 3:** Primer sequence for RFLP analysis. (Page 17)

**Supplementary Table 4:** Primer sequence for RT-PCR. (Page 18)

**Supplementary References:** (Page 19)

## **Supplementary Materials and Methods**

### Direct sequence analysis

Uncleaved band from RFLP analysis was purified using FastGene Gel/PCR extraction kit (NIPPON Genetics) following manufacturer's protocol. The purified DNA was sequenced using commercial sequencing kit (Applied Biosystems, Foster City, CA, USA) and a DNA sequencer (Applied Biosystems) according to the manufacturer's instructions.

### Immunocytochemistry

Cultured cells were fixed in 4% paraformaldehyde and permeabilized in 0.2% triton X-100. These cells were treated with an anti-Flag M2 monoclonal antibody (F1804, Sigma-Aldrich) overnight. After washing, the cells were incubated in fluorescein-isothiocyanate-conjugated anti-mouse IgG (55494, MP Biomedicals) for 60 min. DNA was visualized by 45 µg/ml propidium iodide in PBS for 30 min, and then observed under a confocal laser scanning microscope (LSM 700, Carl Zeiss).

### T7 endonuclease I assay

Genomic DNA from transfected and no transfected HEK 293 cells was subjected to PCR using the primers shown in Supplementary Table 3. The PCR amplicons were purified by agarose-gel extraction following electrophoresis. T7 endonuclease I assay for PCR products was performed according to previous report [1].

### Western blot analysis

Western blot analysis was performed according to the previous report with some modifications [2]. The cells transfected with pCAG-Cas9 plus pCAG-RGR, pCAG-RGR-Cas9, pCAG-RGR-IRES-Cas9 and pCAG-RGR-RGR-IRES-Cas9 were suspended in Laemmli buffer [3]. The antibodies used were anti-Flag-M2 monoclonal antibody (1:500; F1840, Life technologies, USA) and anti- $\beta$ -actin polyclonal antibody (1:3000; GTX109639, GeneTex, Irvine, CA, USA). To visualize the protein-bound antibodies, horseradish peroxidase-conjugated anti-mouse IgG and anti-rabbit IgG (Jackson ImmunoResearch Laboratories, West Grove, PA, USA) were used for the second layer, respectively, followed by a detection procedure using an ECL detection kit (Amersham-Pharmacia) according to the manufacturer's protocol.

### Northern blot analysis and RT-PCR

Total RNA for northern blot analysis and RT-PCR was extracted with TRIzol reagent (Life Technologies) following manufacturer's protocol. The extracted total RNA was quantified using Nanodrop (Thermo Scientific) and normalized to same concentration (200 ng/ $\mu$ l).

Northern blot analysis was carried out as previously described [4]. The DNA sequences for the specific probes were as follows: 5'-TTCAAGTTGATAACGGACTAGCCTT-3' for gRNA and 5'-TTGAACCCTGGACCCTCAGA-3' for tRNA<sup>Lys</sup> [5].

Total RNA was reverse-transcribed using ReverTra Ace (TOYOBO) according to the manufacturer's protocol. Then, RT-PCR was carried out using TaKaRa Ex Taq with a GeneAtlas (ASTECH). The primer sets for RT-PCR were shown in Supplementary Table 4.

## HPRT1

U6-gRNA + CAG-Cas9

CAGGCCACGCGGCA  
CAGGCCCCCCGGGA

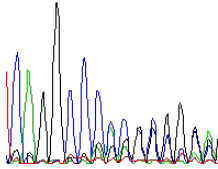

CAG-RGR + CAG-Cas9

CAGGCCACGCGGCA  
CAGGCCCCCCGGGA

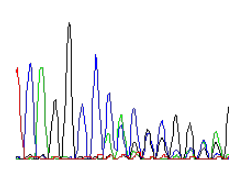

CAG-RGR -eGFP + CAG-Cas9

CAGGCCACGCGGCA  
CAGGNCCCCCGGGA

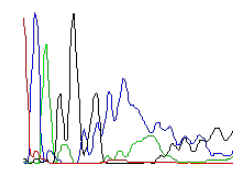

CAG-RGR -IRES-eGFP + CAG-Cas9

CAGGCCACGCGGCA  
CAGGCCACCGGCA

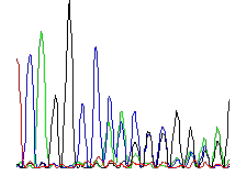

CAG-RGR -IRES-Cas9

CAGGCCACGCGGCA  
CAGGCCCCCGGGCAG

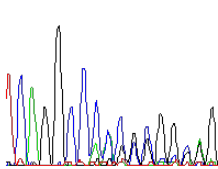

CAG-RGR-Cas9

CAGGCCACGCGGCA  
CAGGCCACCGGGA

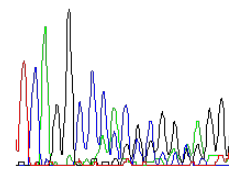

CAG-RGR-RGR -IRES-Cas9

CAGGCCACGCGGCA  
CAGGCCACCGGGA

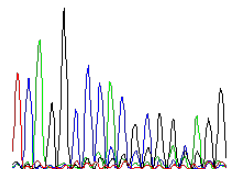

CAG-RGR (FAN1) -IRES-Cas9  
+  
CAG-RGR (HPRT1) -IRES-Cas9

CAGGCCACGCGGCA  
CAGGCCACCGGACA

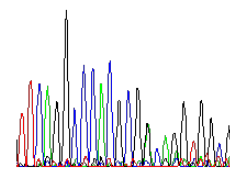

## FAN1

CAG-RGR -IRES-Cas9

AAGTGGATCCAGGGCA  
AAGTGGATCAAGGGGA

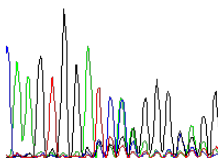

CAG-RGR-RGR -IRES-Cas9

AAGTGGATCCAGGGCA  
AAGTGGATCCAAGGGCA

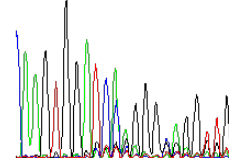

CAG-RGR (FAN1) -IRES-Cas9  
+  
CAG-RGR (HPRT1) -IRES-Cas9

AAGTGGATCCAGGGCA  
AAGTGGATCCNAGGGGA

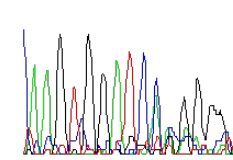

**Supplementary Figure 1. Direct sequence analysis results.** Representative image of the waveform data of a DNA sequencer obtained from an uncleaved band of RFLP analysis. Waveform is disarranged around the PAM domain. The upper nucleotides indicate the wild type sequences. The lower nucleotides indicate the sequences predicted from the waveform. The underline shows the PAM domain.

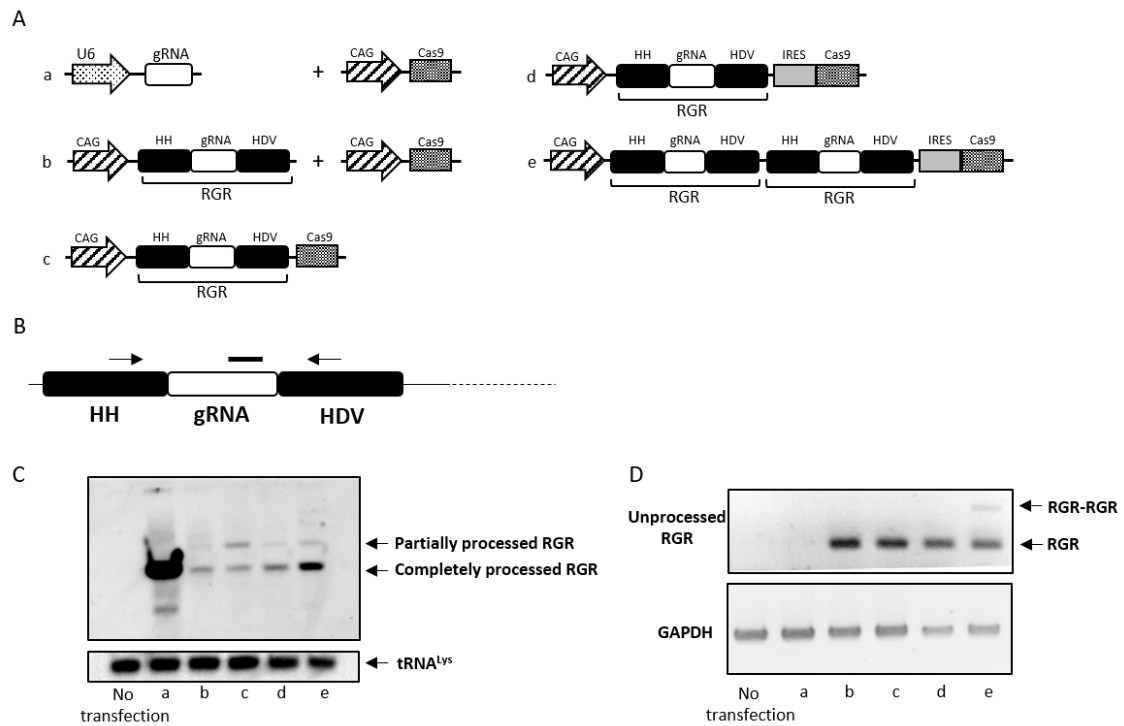

**Supplementary Figure 2. Comparison of gRNA expression level among the U6-gRNA, pCAG-RGR and mono-promoter type vectors.** (A) Schematics of the gRNA and Cas9 expression vectors tested in C and D. All gRNAs targeted *HPRT1* and/or *FAN1*. (B) Schematic illustration of RGR and site information of probe and primers used in this study. Line indicates probe for gRNA detection which designed within the gRNA scaffold. Arrows indicate the primers for unprocessed RGR detection which designed within the HH ribozyme (Forward primer) and the HDV ribozyme (Reverse primer). (C) Representative pictures of Northern blot analysis. HEK 293 cells ( $1 \times 10^5$ ) were transfected with one of the vectors (1  $\mu$ g) and vector sets (500 ng each) shown in (A), and the total RNAs of the cells were extracted 72 h after transfection. The 2  $\mu$ g of the total RNA was subjected to Northern blot analysis (n=3). Upper panel showed completely processed RGR and partially processed RGR. Lower panel showed tRNA<sup>Lys</sup> as an internal control. (D) Representative pictures of RT-PCR. The cDNA reverse transcribed from total RNA was subjected to RT-PCR. Upper panel showed unprocessed RGR and lower panel showed GAPDH as an internal control.

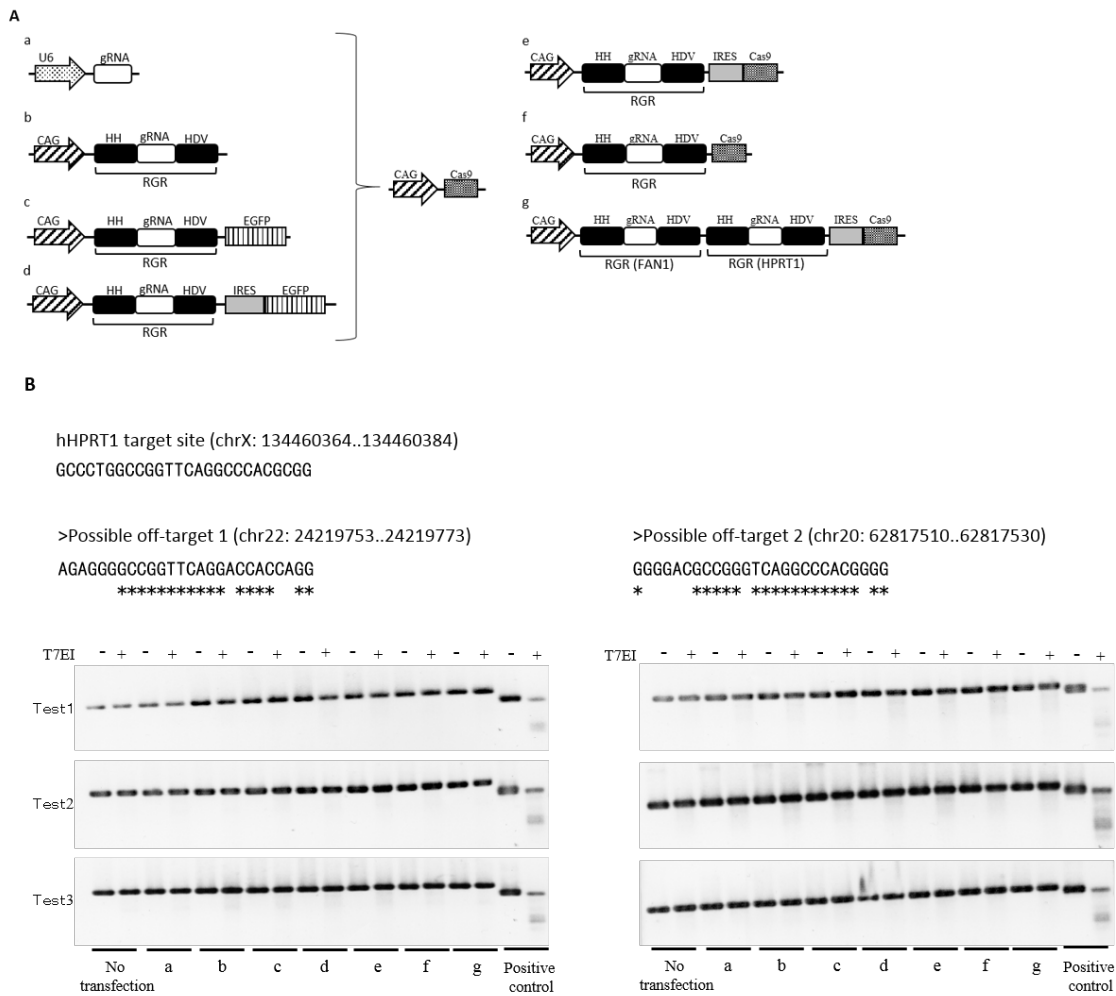

**Supplementary Figure 3. T7EI assay of potential off-target loci for HPRT1.** (A) Schematics of the gRNA expression vectors tested in B. All gRNAs targeted *HPRT1*. (B) HEK 293 cells ( $1 \times 10^5$ ) were transfected with one of the vectors (1  $\mu$ g) and vector sets (500 ng each) and the genomic DNAs of the cells were extracted 72 h after transfection. The DNA was subjected to PCR and 250 ng of the PCR products were subjected to agarose-gel electrophoresis after incubation with or without T7 endonuclease I (n=3). The PCR amplicon derived from Rosa26 heterozygous mutated mouse was used as positive control for T7EI assay.

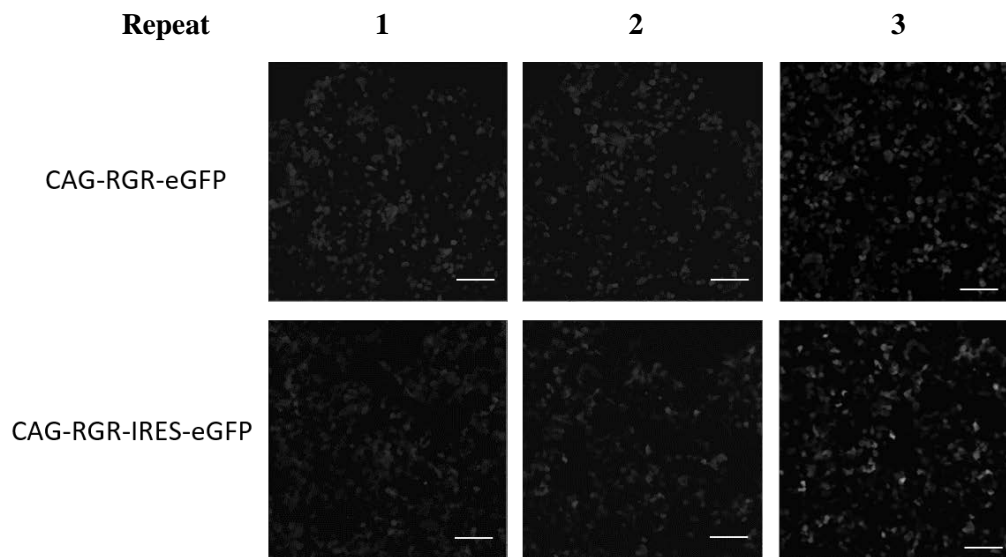

**Supplementary Figure 4. The eGFP expression of pCAG-RGR-eGFP and pCAG-RGR-IRES-eGFP.** Confocal microscopy observation of eGFP expression. HEK 293 cells ( $1 \times 10^5$ ) were transfected with pCAG-RGR-eGFP and pCAG-RGR-IRES-eGFP, and the eGFP expression was observed 72 h after transfection. We repeated three times and each result of three experiments are shown. The scale bars represent 100  $\mu\text{m}$ .

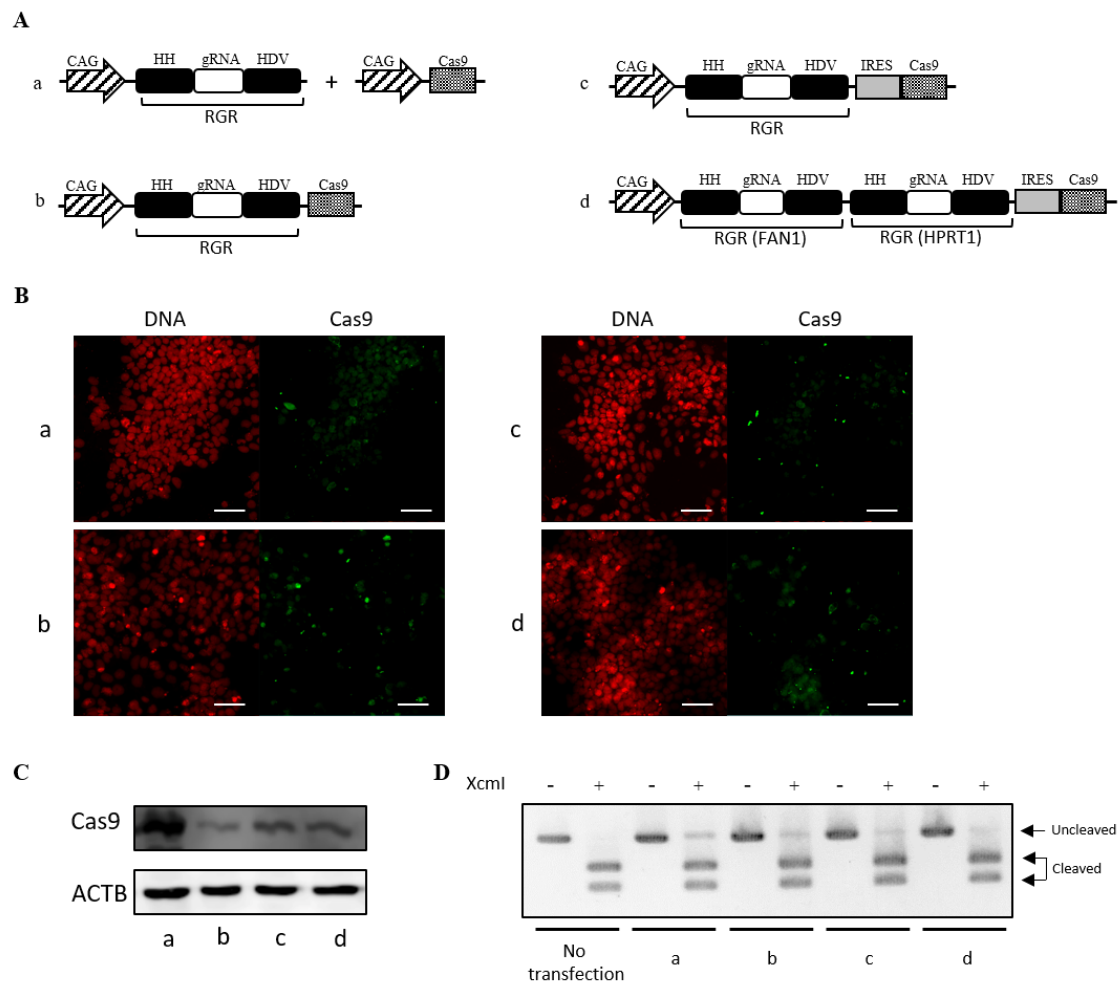

**Supplementary Figure 5. Comparison of Cas9 expression levels between the Cas9 individually-driven CRISPR/Cas9 system and mono-promoter-driven CRISPR/Cas9 system.** (A) Schematics of the gRNA and Cas9 expression vectors tested in immunocytochemistry and RFLP analysis. (B) Representative images of HEK 293 cells stained with propidium iodide (DNA) and anti-Flag M2 monoclonal antibody (Cas9). HEK 293 cells ( $1.5 \times 10^5$ ) were transfected with one of the vectors shown in (A). Twenty four hours later, the cells were subjected to immunocytochemistry. (C) Representative images of western blot analysis. HEK 293 cells ( $1 \times 10^5$ ) were transfected with one of the vectors ( $1 \mu\text{g}$ ) and vector sets ( $500 \text{ ng}$  each) shown in (A), and the lysates of the cells were extracted 72 h after transfection. The cell lysates were subjected to Western blot analysis for Flag-M2 (Cas9) and ACTB expression. (D) Restriction fragment length polymorphism analysis. PCR products ( $300 \text{ ng}$ ) were subjected to agarose-gel electrophoresis after incubation with or without XcmI. Cleaved and uncleaved fragments indicate unmodified and modified genomes, respectively.



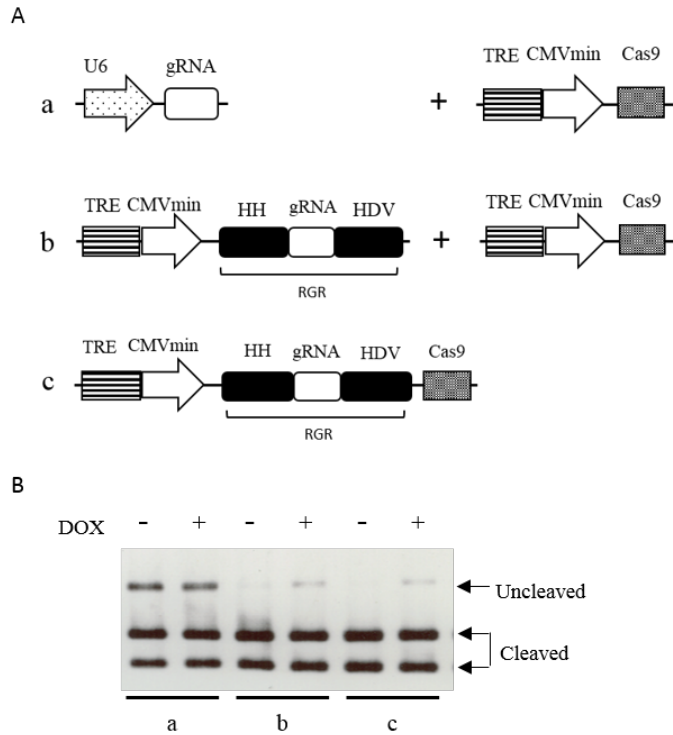

**Supplementary Figure 6. Ubiquitous expression of Cas9 induce the off-doxycycline gene disruption.** (A) Schematics of the gRNA and Cas9 expression vectors tested in doxycyclin-induced gene modification. All gRNAs targeted *HPRT1*. (B) The reverse tetracycline transactivator (rtTA) constitutively-expressing HEK 293 cells ( $1 \times 10^5$ ) were transfected with one of the vectors (1  $\mu\text{g}$ ) and vector sets (500 ng each) shown in (A). Twenty four hours later, the media were replaced to DMEM with 10% of tetracycline-free FBS, and incubated additional 48 hours with/without the doxycycline (1  $\mu\text{g}/\text{ml}$ ), then genomic DNAs of the cells were extracted 72 h after transfection. The DNA was subjected to PCR and the PCR products (300 ng) were subjected to agarose-gel electrophoresis after incubation with or without XcmI. Cleaved and uncleaved fragments indicate unmodified and modified genomes, respectively.

**Supplementary Figure 7. Sequence of vectors and RGR.**

**>Sequence of pCAG-RGR-eGFP vector (from RGR to eGFP)**

CAGGGCCTGATGAGTCCGTGAGGACGAAACGAGTAAGCTCGTCGCCCTGGCCGGTTCAGGCCCACGGTTT  
TAGAGCTAGAAATAGCAAGTTAAAATAAGGCTAGTCCGTTATCAACTTGAAAAAGTGGCACCAGTTCGGT  
GCTTTTGGCCGGCATGGTCCCAGCCTCCTCGCTGGCGCCGGCTGGGCAACATGCTTCGGCATGGCGAATG  
GGACAATCACTAGTGAATTCCTCCTCAGGTGCAGGCTGCCTATCAGAAGGTGGTGGCTGGTGTGGCCAA  
TGCCCTGGCTCACAATAACCACTGAGATCCACCATGGTGAGCAAGGGCGAGGAGCTGTTACCCGGGTGG  
TGCCCATCCTGGTCGAGCTGGACGGCGACGTAACGGCCACAAGTTCAGCGTGTCCGGCGAGGGCGAGGG  
CGATGCCACCTACGGCAAGCTGACCCCTGAAGTTCATCTGCACCACCGCAAGCTGCCCGTGCCCTGGCCC  
ACCCCTCGTGACCACCTGACCTACGGCGTGCAGTGCTTCAGCCGCTACCCCGACCACATGAAGCAGCAG  
ACTTCTTCAAGTCCGCCATGCCGAAAGGCTACGTCCAGGAGCGACCATCTTCTTCAAGGACGACGGCAA  
CTACAAGACCCGCGCCGAGGTGAAGTTCGAGGGCGACACCCTGGTGAACCGCATCGAGCTGAAGGGCATC  
GACTTCAAGGAGGACGGCAACATCCTGGGGACAAGCTGGAGTACAACACAACAGCCACAACGTCTATA  
TCATGGCCGACAAGCAGAAGAACGGCATCAAGGTGAACCTCAAGATCCGCCACAACATCGAGGACGGCAG  
CGTGAGCTCGCCGACCACTACCAGCAGAACACCCCCATCGGCGACGGCCCCGTGCTGCTGCCCGACAAC  
CACTACCTGAGCACCCAGTCCGCCCTGAGCAAAGACCCCAACGAGAAGCGCGATCACATGGTCCTGCTGG  
AGTTCGTGACCGCCCGGGATCACTCTCGGCATGGACGAGCTGTACAAGT

**>Sequence of pCAG-RGR-IRES-eGFP vector (from RGR to eGFP)**

CAGGGCCTGATGAGTCCGTGAGGACGAAACGAGTAAGCTCGTCGCCCTGGCCGGTTCAGGCCCACGGTTT  
TAGAGCTAGAAATAGCAAGTTAAAATAAGGCTAGTCCGTTATCAACTTGAAAAAGTGGCACCAGTTCGGT  
GCTTTTGGCCGGCATGGTCCCAGCCTCCTCGCTGGCGCCGGCTGGGCAACATGCTTCGGCATGGCGAATG  
GGACAATCACTAGTGAATTCCTCCTCAGGTGCAGGCTGCCTATCAGAAGGTGGTGGCTGGTGTGGCCAA  
TGCCCTGGCTCACAATAACCACTGAGATCCGCCCCCTCCTCCCTCCCCCCCCCTAACGTTACTGGCCGAAG  
CCGCTTGAATAAGGCCGGTGTGCGTTTGTCTATATGTTATTTTCCACCATATTGCCGTCTTTTGGCAAT  
GTGAGGGCCCCGAAACCTGGCCCTGTCTTCTTGACGAGCATTCCTAGGGGTCTTTCCCTCTCGCCAAAG  
GAATGCAAGGTCTGTTGAATGTCGTGAAGGAAGCAGTTCCTCTGGAAGCTTCTTGAAGACAAACAACGTC  
TGTAGCGACCCTTTCAGGCAGCGGAACCCCCACCTGGCGACAGGTGCCCTCGCGGCCAAAAGCCACGT  
GTATAAGATACACCTGCAAAGGCGGCACAACCCCAAGTGCCACGTTGTGAGTTGGATAGTTGTGGAAAGAG  
TCAAATGGCTCTCCTCAAGCGTATTCAACAAGGGGCTGAAGGATGCCAGAAGGTACCCCATTTGTATGGG  
ATCTGATCTGGGCCTCGGTACACATGCTTTACATGTGTTTAGTCGAGGTTAAAAAACGTCCTAGGCCCC  
CCGAACCACGGGGACGTGGTTTTCTTTGAAAAACACGATGATAATATGGCCACAACCATGGTGAGCAAG  
GGCGAGGAGCTGTTACCCGGGTGGTGCCCATCCTGGTCGAGCTGGACGGCGACGTAACGGCCACAAGT  
TCAGCGTGTCCGGCGAGGGCGAGGGCGATGCCACCTACGGCAAGCTGACCCCTGAAGTTCATCTGCACCAC  
CGGCAAGCTGCCCGTGCCCTGGCCCACCCCTCGTGACCACCCCTGACCTACGGCGTGCAGTGCTTCAGCCGC  
TACCCCGACCACATGAAGCAGCACGACTTCTTCAAGTCCGCCATGCCCGAAGGCTACGTCCAGGAGCGCA  
CCATCTTCTTCAAGGACGACGGCAACTACAAGACCCGCGCCGAGGTGAAGTTCGAGGGCGACACCCTGGT  
GAACCGCATCGAGCTGAAGGGCATCGACTTCAAGGAGGACGGCAACATCCTGGGGACAAGCTGGAGTAC  
AACTACAACAGCCACAACGTCTATATCATGGCCGACAAGCAGAAGAACGGCATCAAGGTGAACCTCAAGA  
TCCGCCACAACATCGAGGACGGCAGCGTGCAGCTCGCCGACCACTACCAGCAGAACACCCCCATCGGCCGA  
CGGCCCCGTGCTGCTGCCCGACAACCACTACCTGAGCACCCAGTCCGCCCTGAGCAAAGACCCCAACGAG  
AAGCGCGATCACATGGTCCTGCTGGAGTTCGTGACCGCCCGGGATCACTCTCGGCATGGACGAGCTGT  
ACAAGTAA

**>Sequence of pCAG-RGR-IRES-Cas9 vector (from RGR to Cas9)**

CAGGGCCTGATGAGTCCGTGAGGACGAAACGAGTAAGCTCGTCGCCCTGGCCGGTTCAGGCCACGGTTT  
TAGAGCTAGAAAATAGCAAGTTAAAATAAGGCTAGTCCGTTATCAACTTGAAAAAGTGGCACCAGTCCGT  
GCTTTTGGCCGGCATGGTCCCAGCCTCCTCGCTGGCGCCGGCTGGGCAACATGCTTCGGCATGGCGAATG  
GGACAATCACTAGTGAATTCCTCCTCAGGTGCAGGCTGCCTATCAGAAGGTGGTGGCTGGTGTGGCCAA  
TGCCCTGGCTCACAAAATACCACTGAGATCCGCCCCCTCCTCCCTCCCCCCCCCTAACGTTACTGGCCGAAG  
CCGCTTGGAAATAAGGCCGGTGTGCGTTTGTCTATATGTTATTTTCCACCATATTGCCGTCTTTTGGCAAT  
GTGAGGGCCCCGAAACCTGGCCCTGTCTTCTTGACGAGCATTCCCTAGGGGTCTTCCCCTCTCGCCAAAG  
GAATGCAAGGTCTGTTGAATGTGCGTGAAGGAAGCAGTTCCTCTGGAAGCTTCTGAAGACAAACAACGTC  
TGTAGCGACCCTTTCAGGCAGCGAAACCCCCACCTGGCGACAGGTGCCTCTGCGGCCAAAAGCCACGT  
GTATAAGATACACCTGCAAAGCGGCACAACCCAGTGCCACGTTGTGAGTTGGATAGTTGTGGAAAGAG  
TCAAATGGCTCTCCTCAAGCGTATTCAACAAGGGGCTGAAGGATGCCCAGAAGGTACCCATTGTATGGG  
ATCTGATCTGGGGCCTCGGTACACATGCTTTACATGTGTTTAGTCGAGGTTAAAAAACGTCCTAGGCCCC  
CCGAACCACGGGGACGTGGTTTTCTTTGAAAAACACGATGATAATATGGCCACAACCATGGATTACAAG  
GATGACGACGATAAGATCATGGCCCCAAAGAAGAAGCGGAAGGTGCGTATCCACGGAGTCCAGCAGCCG  
ACAAGAAGTACTCCATTGGGCTCGATATCGGCACAAACAGCGTCGGCTGGGCCGTCATTACGGACGAGTA  
CAAGGTGCCGAGCAAAAAATTCAAAGTTCTGGGCAATACCGATCGCCACAGCATAAAGAAGAACCTCATT  
GGCGCCCTCCTGTTGACTCCGGGGAGACCCCGAAGCCACGCGGCTCAAAGAACAGCACGGCGCAGAT  
ATACCCGCAGAAAGAAATCGGATCTGCTACCTGCAGGAGATCTTTAGTAATGAGATGGCTAAGGTGGATGA  
CTCTTTCTTCCATAGGCTGGAGGAGTCCTTTTTGGTGGAGGAGATAAAAAGCACGAGCGCCACCCAATC  
TTTGGCAATATCGTGGACGAGGTGGCGTACCATGAAAAGTACCCAACCATATATCATCTGAGGAAGAAGC  
TTGTAGACAGTACTGATAAGGCTGACTTGCAGTTGATCTATCTCGCGCTGGCGCATATGATCAAATTTCCG  
GGGACACTTCTCATCGAGGGGGACCTGAACCCAGACAACAGCGATGTCGACAAACTCTTTATCCAACCTG  
GTTCAGACTTACAATCAGCTTTTCGAAGAGAACCCGATCAACGCATCCGGAGTTGACGCCAAAGCAATCC  
TGAGCGCTAGGCTGTCCAAAATCCCGGGCGGCTCGAAAACCTCATCGCACAGCTCCCTGGGGAGAAGAAGAA  
CGGCCTGTTTGGTAATCTTATCGCCCTGTCACTCGGGGCTGACCCCCAACTTTAAATCTAACTTCGACCTG  
GCCGAAGATGCCAAGCTTCAACTGAGCAAAGACACCTACGATGATGATCTCGACAATCTGCTGGCCCAGA  
TCGGCGACCAGTACGACAGACCTTTTTTTGGCGGCAAAGAACCTGTCAGACGCCATTCTGCTGAGTGATAT  
TCTGCGAGTGAACACGGAGATCACCAAAGTCCGCTGAGCGCTAGTATGATCAAGCGCTATGATGAGCAC  
CACCAAGACTTGACTTTGCTGAAGGCCCTTGTGACAGCAACTGCCTGAGAAGTACAAGGAAATTTTCT  
TCGATCAGTCTAAAAATGGCTACGCCGGATAACATTGACGGCGGAGCAAGCCAGGAGGAATTTTACAAAT  
TATTAAGCCCATCTTGAAAAAATGGACGGCACCGAGGAGCTGCTGGTAAAGCTTAACAGAGAAGATCTG  
TTGCGCAAACAGCGCACTTTGACAAATGGAAGCATCCCCACCAGATTCACCTGGGCGAACTGCACGCTA  
TCCTCAGGCGGCAAGAGGATTTCTACCCCTTTTTGAAAAGATAACAGGGAAAAGATTGAGAAAATCCTCAC  
ATTTGCGATAACCTACTATGTAGGCCCCCTCGCCCGGGGAAATTCAGATTCGCGTGGATGACTCGCAAA  
TCAGAAGAGACCATCACTCCCTGAACTTCGAGGAAGTCGTGGATAAGGGGGCCTCTGCCAGTCCCTCA  
TCGAAAGGATGACTAACTTTGATAAAAAATCTGCCTAACGAAAAGGTGCTTCCTAACACTCTCTGCTGTA  
CGAGTACTTACAGTTTATAACGAGCTCACCAAGGTCAAATACGTCACAGAAGGGATGAGAAAGCCAGCA  
TTCTGTCTGGAGAGCAGAAGAAAAGCTATCGTGGACCTCCTCTTCAAGACGAACCGGAAAGTTACCGTGA  
AACAGCTCAAAGAAGACTATTTCAAAAAGATTGAATGTTTCGACTCTGTTGAAATCAGCGGAGTGGAGGA  
TCGCTTCAACGCATCCCTGGGAACGTATCACGATCTCCTGAAAATCATTAAAGACAAGGACTTCCTGGAC  
AATGAGGAGAACGAGGACATTCTTGAGGACATTGTCCCTACCCCTTACGTTGTTTGAAGATAGGGAGATGA  
TTGAAGAACGCTTGAAAACTTACGCTCATCTCTTCGACGACAAAGTCATGAAACAGCTCAAGAGGCGCCG  
ATATACAGGATGGGGGCGGCTGTCAAGAAAACTGATCAATGGGATCCGAGACAAGCAGAGTGGAAAGACA  
ATCCTGGATTTTCTTAAGTCCGATGGATTTGCCAACCGGAACTTCATGCAGTTGATCCATGATGACTCTC  
TCACCTTTAAGGAGGACATCCAGAAAAGCACAAGTTTCTGGCCAGGGGACAGTCTTACGAGCACATCGC  
TAATCTTGCAAGTAGCCAGCTATCAAAAAGGGAATACTGCAGACCGTTAAGGTGCTGGATGAACTCGTC  
AAAGTAATGGGAAGGCATAAGCCCGAGAATATCGTTATCGAGATGGCCCGAGAGAACCAAACTACCCAGA  
AGGGACAGAAGAACAGTAGGGAAAAGGATGAAGAGGATTGAAGAGGGTATAAAAAGAACTGGGGTCCCAAT  
CCTTAAGGAACACCCAGTTGAAAAACCCAGCTTCAGAATGAGAAGCTTACCTGTACTACCTGCAGAAC  
GGCAGGGACATGTACGTGGATCAGGAACTGGACATCAATCGGCTCTCCGACTACGACGTGGATCATATCG

TGCCCCAGTCTTTTCTCAAAGATGATTCTATTGATAATAAAGTGTGACAAGATCCGATAAAAAATAGAGG  
GAAGAGTGATAACGTCCCCTCAGAAGAAGTTGTCAAGAAAAATGAAAAATTATTGGCGGCAGCTGCTGAAC  
GCCAAACTGATCACACAACGGAAAGTTCGATAATCTGACTAAGGCTGAACGAGGTGGCCTGTCTGAGTTGG  
ATAAAGCCGGCTTCATCAAAAAGGCAGCTTGTGAGACACGCCAGATCACCAAGCACGTGGCCCAAATTCT  
CGATTCACGCATGAACACCAAGTACGATGAAAAATGACAACTGATTTCGAGAGGTGAAAGTTATTACTCTG  
AAGTCTAAGCTGGTCTCAGATTTTCAGAAAAGGACTTTCAGTTTTATAAGGTGAGAGAGATCAACAATTACC  
ACCATGCGCATGATGCCTACCTGAATGCAGTGGTAGGCACTGCACTTATCAAAAAATATCCCAAGCTTGA  
ATCTGAATTTGTTTACGGAGACTATAAAGTGTACGATGTTAGGAAAAATGATCGCAAAGTCTGAGCAGGAA  
ATAGGCAAGGCCACCGCTAAGTACTTCTTTTACAGCAATATTATGAATTTTTTCAAGACCGAGATTACAC  
TGGCCAATGGAGAGATTTCGGAAGCGACCACTTATCGAAACAAACGGAGAAACAGGAGAAATCGTGTGGGA  
CAAGGGTAGGGATTTTCGCGACAGTCCGGAAGTCTGTCCATGCCGCAGGTGAACATCGTTAAAAAGACC  
GAAGTACAGACCGGAGGCTTCTCCAAGGAAAGTATCCTCCCGAAAAGGAACAGCGACAAGCTGATCGCAC  
GCAAAAAAGATTGGGACCCCAAGAAATACGGCGGATTTCGATTCTCCTACAGTCGCTTACAGTGTACTGGT  
TGTGGCCAAAGTGGAGAAAAGGGAAGTCTAAAAAACTCAAAAGCGTCAAGGAACTGCTGGGCATCACAATC  
ATGGAGCGATCAAGCTTCGAAAAAACCCCATCGACTTCTCGAGGCGAAAGGATATAAAGAGGTCAAAA  
AAGACCTCATATTAAGCTTCCCAAGTACTCTCTTTGAGCTTGAACCGCCGAAACGAATGCTCGC  
TAGTGGCGGCGAGCTGCAGAAAAGTAAACGAGCTGGCACTGCCCTCTAAATACGTTAATTTCTTGTATCTG  
GCCAGCCACTATGAAAAGCTCAAAGGGTCTCCCGAAGATAATGAGCAGAAGCAGCTGTTCTGGAACAAC  
ACAAACTACTCTTGTGAGATCATCGAGCAAATAAGCGAATTTCTCCAAAAGAGTGATCCTCGCCGACGC  
TAACCTCGATAAGGTGCTTTCTGCTTACAATAAGCACAGGGATAAGCCCATCAGGGAGCAGGCAGAAAAC  
ATTATCCACTTGTTACTCTGACCAACTGGGCGCGCCTGCAGCCTTCAAGTACTTCGACACCACCATAG  
ACAGAAAAGCGGTACACCTCTACAAAAGGAGTCTGGACGCCACACTGATTCATCAGTCAATTACGGGGCT  
CTATGAAAACAAGAAATCGACCTCTCTCAGCTCGGTGGAGACAGCAGGGCTGACCCCAAGAAGAAGAGGAAG  
GTGTGA

>Sequence of universal vector (fromMCS to Cas9)

GTCGACGACGTCACCGGTGTACAGCTAGCGCGGCCGCTATACCCGCGGGCATGCTCTAGAGCCTCTGCT  
AACCATGTTTCATGCCTTCTTCTTTTCCCTACAGCTCCTGGGCAACGTGCTGGTTATTGTGCTGTCTCATC  
ATTTTGGCAAAGAATTCGATTCCGGAGAGACGGGATCCCGTCTCTGTTTTAGAGCTAGAAATAGCAAGTT  
AAAATAAGGCTAGTCCGTTATCAACTTGAAAAAGTGGCACCAGTCGGTGTCTTTGGCCGGCATGGTCCC  
AGCCTCCTCGCTGGCGCCGGCTGGGCAACATGCTTCGGCATGGCGAATGGGACAATCACTAGTGAATTCA  
CTCCTCAGGTGCAGGCTGCCTATCAGAAGGTGGTGGCTGGTGTGGCCAATGCCCTGGCTCACAATAACCA  
CTGAGATCCGCCCTCTCCCTCCCCCCCCCTAACGTTACTGGCCGAAGCCGCTTGAATAAGGCCGGTG  
TGCGTTTGTCTATATGTTATTTTCCACCATATTGCCGTCTTTTGGCAATGTGAGGGCCCCGAAACCTGGC  
CCTGTCTTCTTGACGAGCATTCTAGGGGTCTTCCCCTCTCGCAAAGGAATGCAAGGTCTGTTGAATG  
TCGTGAAGGAAGCAGTTCCTCTGGAAGCTTCTTGAAGACAAAACAACGTCTGTAGCGACCCTTTCAGGCA  
GCGGAACCCCCACCTGGCGACAGGTGCCTCTGCGGCCAAAAGCCACGTGTATAAGATACACCTGCAAAG  
GCGGCACAACCCAGTGCCACGTTGTGAGTTGGATAGTTGTGAAAAGAGTCAAATGGCTCTCCTCAAGCG  
TATTCAAACAAGGGGCTGAAGGATGCCCAGAAGGTACCCCATTTGTATGGGATCTGATCTGGGGCCTCGGTA  
CACATGCTTTACATGTGTTTAGTCGAGGTTAAAAAACGTCTAGGCCCCCCGAACCACGGGGACGTGGTT  
TTCCTTTGAAAAACACGATGATAATATGGCCACAACCATGGATTACAAGGATGACGACGATAAGATCATG  
GCCCCAAAGAAGAAGCGGAAGTTCGGTATCCACGGAGTCCCAGCAGCCGACAAGAAGTACTCCATTGGGC  
TCGATATCGGCACAAAACAGCGTCCGGTGGGCCGTCATTACGGACGAGTACAAGGTGCCGAGCAAAAAATT  
CAAAGTTCTGGGCAATAACCGATCGCCACAGCATAAAGAAGAACCCTCATTGGCGCCCTCCTGTTGACTCC  
GGGGAGACGGCCGAAGCCACGCGGCTCAAAAAGAACAGCACGGCGCAGATATACCCGCAGAAAAGAATCGGA  
TCTGCTACCTGCAGGAGATCTTTAGTAATGAGATGGCTAAGGTGGATGACTCTTCTTCCATAGGCTGGA  
GGAGTCTTTTTGGTGGAGGAGGATAAAAAAGCACGAGCGCCACCCAATCTTTGGCAATATCGTGGACGAG  
GTGGCGTACCATGAAAAGTACCCAACCATATATCATCTGAGGAAGAAGCTTGTAGACAGTACTGATAAGG

CTGACTTGCGGTTGATCTATCTCGCGCTGGCGCATATGATCAAATTCGGGGACACTTCCTCATCGAGGG  
GGACCTGAACCCAGACAACAGCGATGTCGACAAACTCTTTATCCAACCTGGTTCAGACTTACAATCAGCTT  
TTCGAAGAGAACCCGATCAACGCATCCGGAGTTGACGCCAAAGCAATCCTGAGCGCTAGGCTGTCCAAT  
CCCGCGGCTCGAAAACCTCATCGCACAGCTCCCTGGGGAGAAGAAGAACGGCCTGTTTGGTAATCTTAT  
CGCCCTGTCACTCGGGCTGACCCCAACTTTAAATCTAACTTCGACCTGGCCGAAGATGCCAAGCTTCAA  
CTGAGCAAAGACACCTACGATGATGATCTCGACAATCTGCTGGCCAGATCGGCGACCAGTACGCAGACC  
TTTTTTTGGCGGCAAAGAACCTGTCAGACGCCATTCTGCTGAGTGATATTCTGCGAGTGAACACGGAGAT  
CACCAAAGCTCCGCTGAGCGCTAGTATGATCAAGCGCTATGATGAGCACCACCAAGACTTGACTTTGCTG  
AAGGCCCTTGTGAGACAGCAACTGCCTGAGAAGTACAAGGAAATTTTCTTCGATCAGTCTAAAAATGGCT  
ACGCCGATACATTGACGGCGAGCAAGCCAGGAGGAATTTTACAAATTTATTAAGCCCATCTTGAAAA  
AATGGACGGCACCAGGAGCTGCTGGTAAAGCTTAACAGAGAAGATCTGTTGCGCAAACAGCGCACTTC  
GACAATGGAAGCATCCCCACCAGATTACCTGGGCGAACTGCACGCTATCCTCAGGCGCAAGAGGATT  
TCTACCCCTTTTTGAAAAGATAACAGGGAAAAGATTGAGAAAATCCTCACATTTTCGATACCCTACTATGT  
AGCCCCCTCGCCCGGGAAATTCAGATTTCGCGTGGATGACTCGCAAATCAGAAGAGACCATCACTCCC  
TGAACTTCGAGGAAGTCGTGGATAAGGGGGCCTCTGCCAGTCCCTCATCGAAAGGATGACTAACTTTG  
ATAAAAAATCTGCCTAACGAAAAGGTGCTTCCTAAACACTCTCTGCTGTACGAGTACTTCACAGTTTATAA  
CGAGCTACCAAGGTCAAATACGTCACAGAAGGGATGAGAAAAGCCAGCATTCCTGTCTGGAGAGCAGAAG  
AAAGCTATCGTGGACCTCCTCTTCAAGACGAACCGGAAAGTTACCGTGAACAGCTCAAAGAAGACTATT  
TCAAAAAAGATTGAATGTTTCGACTCTGTTGAAATCAGCGGAGTGGAGGATCGCTTCAACGCATCCCTGGG  
AACGTATCACGATCTCCTGAAAATCATTAAAGACAAGGACTTCCTGGACAATGAGGAGAACGAGGACATT  
CTTGAGGACATTGTCTCACCTTACGTTGTTTGAAGATAGGGAGATGATTGAAGAACGCTTGAACACTT  
ACGCTCATCTCTTCGACGACAAAAGTCATGAAACAGCTCAAGAGGCGCCGATATACAGGATGGGGGCGGCT  
GTCAAGAAAATGATCAATGGGATCCGAGACAAGCAGAGTGGAAAGACAATCCTGGATTTTCTTAAGTCC  
GATGGATTTGCCAACCGAACTTCATGCAGTTGATCCATGATGACTCTCTCACCTTTAAGGAGGACATCC  
AGAAAAGCACAAGTTTCTGGCCAGGGGACAGTCTTCACGAGCACATCGCTAATCTTGCAGGTAGCCCAGC  
TATCAAAAAGGGAATACTGCAGACCGTTAAGGTCGTGGATGAACTCGTCAAAGTAATGGGAAGGCATAAG  
CCCGAGAATATCGTTATCGAGATGGCCCGAGAGAACCAAACCTACCCAGAAGGGACAGAAGAACAGTAGGG  
AAAGGATGAAGAGGATTGAAGAGGGTATAAAAAGAACTGGGGTCCCAAATCCTTAAGGAACACCCAGTTGA  
AAACACCCAGCTTCAGAAATGAGAAGCTCTACCTGTACTACCTGCAGAACGGCAGGGACATGTACGTGGAT  
CAGGAACTGGACATCAATCGGCTCTCCGACTACGACGTGGATCATATCGTGCCCCAGTCTTTTCTCAAAG  
ATGATTCTATTGATAATAAAGTGTGACAAGATCCGATAAAAAATAGAGGGAAGAGTGATAACGTCCCCTC  
AGAAGAAGTTGTCAAGAAAATGAAAAATTTATTGGCGGCAGCTGCTGAACGCCAAACTGATCACACAACGG  
AAGTTTCGATAATCTGACTAAGGCTGAACGAGGTGGCCTGTCTGAGTTGGATAAAGCCGGCTTCATAAAA  
GGCAGCTTGTGAGACACGCCAGATCACCAAGCACGTGGCCCAAATTCCTCGATTCACGCATGAACACCAA  
GTACGATGAAAATGACAACTGATTTCGAGAGGTGAAAGTTATTACTCTGAAGTCTAAGCTGGTCTCAGAT  
TTCAGAAAAGACTTTCAGTTTATAAGGTGAGAGAGATCAACAATTAACCATGCGCATGATGCCTACC  
TGAATGCAGTGGTAGGCACTGCACTTATCAAAAAATATCCCAAGCTTGAATCTGAATTTGTTTACGGAGA  
CTATAAAGTGTACGATGTTAGGAAAATGATCGCAAAGTCTGAGCAGGAAATAGGCAAGGCCACCGCTAAG  
TACTTCTTTTACAGCAATATTATGAATTTTTTCAAGACCGAGATTACACTGGCCAATGGAGAGATTCCGA  
AGCGACCACTTATCGAAAACAAACGGAGAAAACAGGAGAAAATCGTGTGGGACAAGGGTAGGGATTTCCGGAC  
AGTCCGGAAGGTCTGTCCATGCCGAGGTGAACATCGTTAAAAAGACCGAAGTACAGACCGGAGGCTTC  
TCCAAGGAAAATATCCTCCCAGAAAAGAACAGCGACAAGCTGATCGCACGCAAAAAAGATTGGGACCCCA  
AGAAAATACGGCGGATTCGATTTCTCTACAGTCGCTTACAGTGTACTGGTTGTGGCCAAAGTGGAGAAAAG  
GAAGTCTAAAAAACTCAAAAAGCGTCAAGGAACTGCTGGGCATCACAATCATGGAGCGATCAAGCTTCGAA  
AAAAACCCCATCGACTTTCTCGAGGCGAAAAGGATATAAAGAGGTCAAAAAAGACCTCATCATTAAAGCTTC  
CCAAGTACTCTCTTTGAGCTTGAACACGGCCGAAAACGAATGCTCGCTAGTGGGGCGAGCTGCAGAA  
AGGTAACGAGCTGGCACTGCCCTCTAAATACGTTAATTTCTTGTATCTGGCCAGCCACTATGAAAAGCTC  
AAAGGTCTCCCGAAGATAATGAGCAGAAGCAGCTGTTTCGTGGAACAACACAAACACTACCTTGATGAGA  
TCATCGAGCAAATAAGCGAATTTCTCCAAAAGAGTGATCCTCGCCGACGCTAACCTCGATAAGGTGCTTTC  
TGCTTACAATAAGCACAGGGATAAGCCCATCAGGGAGCAGGCAGAAAACATTATCCACTTGTTTACTCTG

ACCAACTTGGGCGCGCCTGCAGCCTTCAAGTACTTCGACACCACCATAGACAGAAAGCGGTACACCTCTA  
CAAAGGAGGTCCTGGACGCCACACTGATTCATCAGTCAATTACGGGGCTCTATGAAACAAGAATCGACCT  
CTCTCAGCTCGGTGGAGACAGCAGGGCTGACCCCAAGAAGAAGAGGAAGGTGTGA

>HPRT1 gRNA (Target site recognition sequence to gRNA scaffold)

CCCTGGCCGGTTCAGGCCACGGTTTTAGAGCTAGAAATAGCAAGTTAAAATAAGGCTAGTCCGTTATCA  
ACTTGAAAAAGTGGCACCGAGTCGGTGCTTTTT

>HPRT1 RGR (HH ribozyme to HDV ribozyme)

CAGGGCCTGATGAGTCCGTGAGGACGAAACGAGTAAGCTCGTCGCCCTGGCCGGTTCAGGCCACGGTTT  
TAGAGCTAGAAATAGCAAGTTAAAATAAGGCTAGTCCGTTATCAACTTGAAAAAGTGGCACCGAGTCGGT  
GCTTTTGGCCGGCATGGTCCCAGCCTCCTCGCTGGCGCCGGCTGGGCAACATGCTTCGGCATGGCGAATG  
GGAC

>FAN1 RGR (HH ribozyme to HDV ribozyme)

GAAGTCCTGATGAGTCCGTGAGGACGAAACGAGTAAGCTCGTCGACTTCGTTCAAGTGGATCCGTTTTAG  
AGCTAGAAATAGCAAGTTAAAATAAGGCTAGTCCGTTATCAACTTGAAAAAGTGGCACCGAGTCGGTGT  
TTTGGCCGGCATGGTCCCAGCCTCCTCGCTGGCGCCGGCTGGGCAACATGCTTCGGCATGGCGAATGGGA  
C

| Target locus | Target sequence                      | Primer sequence for RGR                                                                                                                                      |
|--------------|--------------------------------------|--------------------------------------------------------------------------------------------------------------------------------------------------------------|
| HPRT1        | 5'-GCCCTGGCCGGTTCAGGCC <b>ACGCGG</b> | Fw: 5'-CAGGGCCTGATGAGTCCGTGAGGACGAAACGAGTAAGCTCGTCGCCCTGGCCGGTTCAGGC<br>CCACGGTTTTAGAGCTAGAAATAGC                                                            |
|              |                                      | Rv: 5'-GTCCCATTCGCCATGCCGAAGCATGTTGCCAGCCGGCCAGCGAGGAGGCTGGGACCATGCCGGCCAAAAG<br>CACCGACTCGGTGCCACTTTTTCAAGTTGATAACGGACTAGCCTATTTTAACTTGCTATTTCTAGCTCTAAAAC  |
| FAN1         | 5'-GACTTCGTTCAAGTGGATCC <b>AGG</b>   | Fw: 5'-GAAGTCCTGATGAGTCCGTGAGGACGAAACGAGTAAGCTCGTCGACTTCGTTCAAGTGGATCC<br>GTTTTAGAGCTAGAAATAGC                                                               |
|              |                                      | Rv: 5'-CGACTAGTGTCCCATTCGCCATGCCGAAGCATGTTGCCAGCCGGCCAGCGAGGAGGCTGGGACCATGCCGGC<br>CAAAGCACCGACTCGGTGCCACTTTTTCAAGTTGATAACGGACTAGCCTATTTTAACTTGCTATTTCTAGCTC |

**Supplementary Table 1.** Target sequence of human *HPRT1* and *FAN1* locus tested in this study and primers for RGR. Bold characters show PAM domain.

|                    |                                                                                                                                                               |
|--------------------|---------------------------------------------------------------------------------------------------------------------------------------------------------------|
| Multi cloning site | Fw: 5'-TCGACGACGTCACCGGTGTACAGCTAGCGCGGCCGCGTATACCCGCGGGCATGCT                                                                                                |
|                    | Rv: 5'-CTAGAGCATGCCCCGCGGTATACGCGGCCGCGCTAGCTGTACACCGGTGACGTCG                                                                                                |
| RGR                | Fw: 5'-CCGGAGAGACGGGATCCCGTCTCTGTTTTAGAGCTAGAAATAGC                                                                                                           |
|                    | Rv: 5'-GTCCCATTCGCCATGCCGAAGCATGTTGCCAGCCGGCGCCAGCGAGGAGGCTGGGACCATGCCGGCCAAAAG<br>CACCGACTCGGTGCCACTTTTTCAAGTTGATAACGGACTAGCCTTATTTAACTTGCTATTTCTAGCTCTAAAAC |

**Supplementary Table 2.** Primer sequence for universal vector.



| Target locus | Primer sequence                    |
|--------------|------------------------------------|
| HPRT1        | Fw: 5'-GAGAAAATTCCCACGGCTACCTAG    |
|              | Rv: 5'-CAGAGCTGTAGTGGGGCTTC        |
| FAN1         | Fw: 5'-TCCCACTTTTGGTGATTTCAAGTCAAG |
|              | Rv: 5'-CTCTGTGGACTAGAACCGGC        |
| Off-target1  | Fw: 5'-AGGACTGAGTCGGCTCCTAA        |
|              | Rv: 5'-GCACAAGGGGGCCTTTGTTC        |
| Off-target2  | Fw: 5'-GAGTGGTGAGGTGTTGGGAG        |
|              | Rv: 5'-GAGGCCCTTCTTCCTGAACG        |

**Supplementary Table 3.** Primer sequence for RFLP analysis and T7E1 assay.

|       |                             |
|-------|-----------------------------|
| RGR   | Fw: 5'-GAGTCCGTGAGGACGAAACG |
|       | Rv: 5'-CGCCATGCCGAAGCATGTTG |
| GAPDH | Fw: 5'-CATCACCATCTTCCAGGAGC |
|       | Rv: 5'-GCAGGGATGATGTTCTGGAG |

**Supplementary Table 4.** Primer sequence for RT-PCR

## Supplementary References

1. Fujii, W., Kawasaki, K., Sugiura, K. & Naito, K. Efficient generation of large-scale genome-modified mice using gRNA and CAS9 endonuclease. *Nucleic Acids Res* **41**, e187 (2013).
2. Fujii, W., Onuma, A., Sugiura, K. & Naito, K. Efficient generation of genome-modified mice via offset-nicking by CRISPR/Cas system. *Biochem Biophys Res Commun* **445**, 791-794 (2014).
3. Laemmli, U. K. Cleavage of structural proteins during the assembly of the head of bacteriophage T4. *Nature* **227**, 680-685 (1970).
4. Tomita, K., Ogawa, T., Uozumi, T., Watanabe, K. & Masaki, H. A cytotoxic ribonuclease which specifically cleaves four isoaccepting arginine tRNAs at their anticodon loops. *Proc Natl Acad Sci U S A* **97**, 8278-8283 (2000).
5. Ogawa, T., Shimizu, A., Takahashi, K., Hidaka, M. & Masaki, H. Mitochondrial tRNA cleavage by tRNA-targeting ribonuclease causes mitochondrial dysfunction observed in mitochondrial disease. *Biochem Biophys Res Commun* **451**, 131-136 (2014).
